# Supplementary material for: Goat Milk Consumption Enhances Innate and Adaptive Immunities and Alleviates Allergen-Induced Airway Inflammation in Offspring Mice
Source: PubMed Central journal article supplement (PMC7040033; doi:10.3389/fimmu.2020.00184), 2020-02-18

## Supplementary Fig. 3

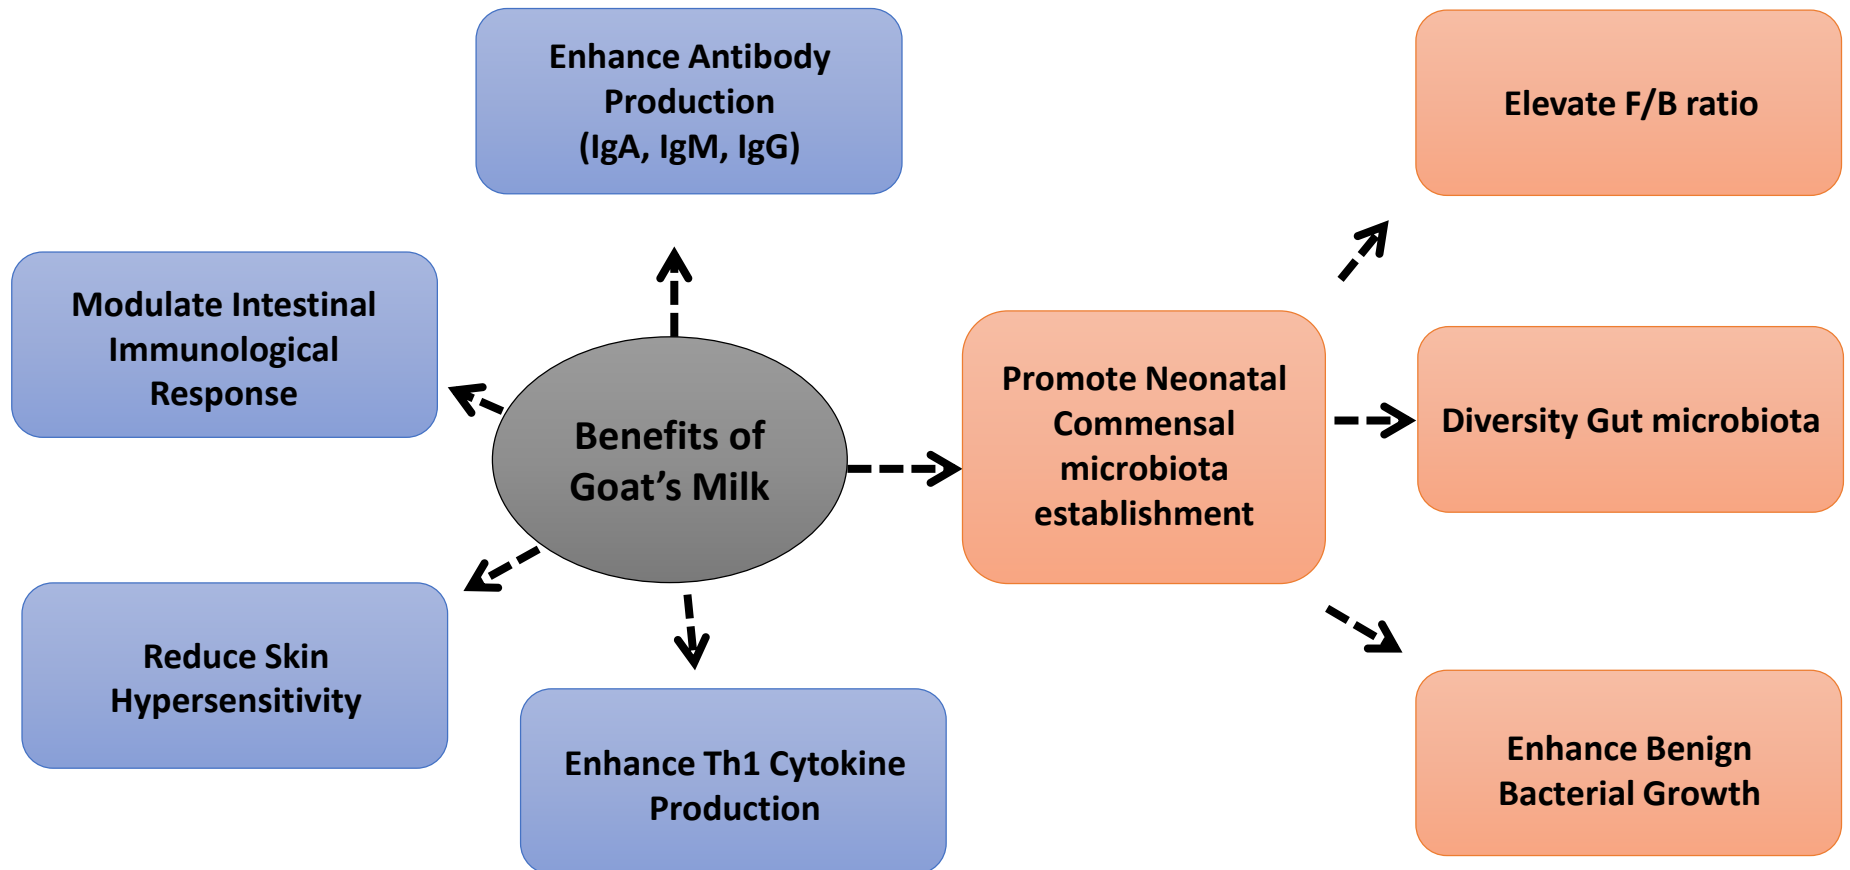

Supplement: Image_3.pdf [file Image_3.pdf]
